1 **Main Title: Implementation and effectiveness outcomes of Community**  
2 **Health Advocacy Teams to improve long-lasting insecticide net distribution**  
3 **and use in six districts in Ghana: a one-group pre-post-test study.**

4  
5 **Short Title: Implementation and Effectiveness of Community Health**  
6 **Advocacy Teams in Ghana**

7  
8 Franklin N. Glozah<sup>1</sup>, Philip Teg-Nefaah Tabong<sup>1\*</sup>, Eva Bazant<sup>2</sup>, Emmanuel Asampong<sup>1</sup>, Ruby  
9 Hornuvo<sup>1</sup>, Adanna Nwameme<sup>1</sup>, Nana Yaw Peprah<sup>3</sup>, Gloria M. Chandi<sup>4</sup>, Philip Baba Adongo<sup>1</sup>,  
10 Phyllis Dako-Gyeke<sup>1</sup>

11  
12 <sup>1</sup>Department of Social and Behavioural Sciences, School of Public Health, University of  
13 Ghana, Accra, Ghana

14 <sup>2</sup>Health Campaign Effectiveness Coalition, Task Force for Global Health, Decatur, Georgia,  
15 USA

16 <sup>3</sup>National Malaria Elimination Programme, Accra, Ghana

17 <sup>4</sup>Ghana Health Service, Ga North Municipal Health Directorate, Greater Accra, Ghana

18  
19 \*Corresponding author: [ptabong@ug.edu.gh](mailto:ptabong@ug.edu.gh)

20

21

22

23

24

**NOTE: This preprint reports new research that has not been certified by peer review and should not be used to guide clinical practice.**

25

26

27

28

## 29 **Abstract**

30 Malaria remains a leading cause of illness and death especially among children and pregnant  
31 women in Ghana. Despite the efforts made by the National Malaria Elimination Programme  
32 (NMEP), including distribution of Long-Lasting Insecticide Nets (LLIN) to households through  
33 periodic Point Mass Distribution (PMD) campaigns and continuous channels (antenatal,  
34 schools and postnatal), there is a gap between access and use of LLINs in Ghana. An  
35 effective and functional community-based group that would seek to improve the  
36 effectiveness of LLIN distribution before, during, after PMD Campaigns and continuous  
37 distribution at the community level could help address this gap. This paper assesses the  
38 implementation outcomes and short-term effectiveness of the pilot implementation of co-  
39 created community health advocacy teams (CHAT) intervention in Ghanaian communities to  
40 plan and implement campaigns to increase LLIN use. The study employed a one-group pre-  
41 post study design and measured implementation outcomes (acceptability, appropriateness,  
42 and feasibility) and effectiveness outcomes (LLIN awareness, LLIN access, willingness to  
43 purchase LLIN, and LLIN use) among 800 community households. The CHAT intervention was  
44 implemented for four months across six districts in the Eastern and Volta regions of Ghana.  
45 The data were downloaded directly from REDCap and analyzed statistically (descriptive and  
46 McNemar test of association) using SPSS 22 software. After the implementation period, the  
47 majority of respondents in all six districts indicated that the CHAT intervention was  
48 acceptable (89.8%), appropriate (89.5%), and feasible (90%). Also, there was a significant  
49 association between baseline and end-line assessment on all four effectiveness outcome  
50 measures. Household members' awareness of, access to, willingness to purchase, and use of  
51 LLINs increased significantly over the four-month period that the CHAT intervention was  
52 implemented. The study concludes that CHAT is an acceptable, appropriate, and feasible  
53 intervention for supporting the National Malaria Programme in LLIN PMD and for engaging  
54 in Social and Behaviour Change Communication activities through the continuous channels

55 of distribution. Additionally, the CHAT demonstrates short-term effectiveness outcomes in  
56 terms of creating LLIN awareness, providing access to LLIN, and encouraging Ghanaian  
57 community members to be willing to purchase and use LLINs. Although the activities of  
58 CHAT members were largely voluntary, integration into the existing primary health care  
59 system will make it sustainable.

60

61

62

63

64

65

66

## 67 **Background**

68 Globally, there were an estimated 247 million cases of malaria and 619,000 malaria deaths  
69 in 2021, with the WHO African Region recording a relatively high malaria burden: 95% of  
70 malaria cases and 96% of deaths among children under 5, accounting for 80% of malaria  
71 mortality in the Region [1]. Malaria remains a major cause of illness and death in Ghana,  
72 especially among children and pregnant women, accounting for 41% of suspected  
73 outpatient, 21% confirmed, and 18% of inpatient malaria cases in 2020. The disease  
74 continues to be the most expensive for the National Health Insurance Scheme (NHIS) to  
75 cover and has a huge impact on all aspects of human life [2]. Although Ghana's entire  
76 population is at risk of malaria infection, pregnant women, and children under five years of  
77 age are at higher risk of severe illness due to their lowered immunity. Ghana is one of the 15  
78 countries in Africa with the highest malaria burden, with 2.1% of malaria cases and 1.9% of  
79 malaria deaths. From 2017 to 2020, about 4.3% of West African malaria cases in were in  
80 Ghana [3].

81  
82 The National Malaria Elimination Programme (NMEP) is responsible for reducing malaria  
83 morbidity and mortality in Ghana. Over the years, the programme has carried out several  
84 malaria prevention interventions such as the Point Mass Distribution (PMD) of Long-Lasting  
85 Insecticide-Treated Nets (LLINs) [2]. The distribution and use of LLINs are core interventions  
86 for preventing malaria infection in malaria-endemic countries, including Ghana. LLINs  
87 provide protection against mosquito bites, repel, and kill mosquitoes, thereby reducing the  
88 transmission of malaria parasites and decreasing malaria risk at the individual and  
89 community levels when high coverage is achieved [4]. The 2014-2020 Ghana Strategic Plan  
90 for Malaria Control focused on scaling up LLIN use and other malaria interventions including  
91 ownership and use of mosquito nets, indoor residual spraying (IRS), and intermittent  
92 preventive treatment during pregnancy using sulfadoxine and pyrimethamine (IPTp-SP)] to  
93 reduce the malaria morbidity and mortality burden by 75% by 2020 [4].

94  
95 Mosquito nets can be obtained mainly during PMD campaigns; however, as part of targeted  
96 continuous distribution programmes, LLINs are distributed through antenatal care (ANC),  
97 child welfare clinics (CWC), and primary schools. During their initial ANC visit, pregnant

98 women are the focus of distribution in health facilities. The LLINs are given out free to  
99 children 18 months or older as part of child welfare visits, at the time of their second dose  
100 of the measles-rubella vaccine [4]. Children in Primary 2 and Primary 6 in public and private  
101 schools across the country receive free nets as part of school-based distributions in years  
102 when a PMD campaign does not take place [4].

103

104 Even though over the years there have been improvements in overall LLIN ownership,  
105 NMEP's strategic goal of 80% utilisation among pregnant women and children under five is  
106 yet to be met. The 2019 Ghana Malaria Indicator Survey shows that 67% of Ghanaian  
107 households have LLINs (access), but only 43% of the Ghanaian household population slept  
108 under a net the night before the survey. This indicates that a relatively large number of  
109 people have not slept under the LLIN despite the distribution campaign. These distribution  
110 efforts have exposed a high proportion of Ghanaians to having at least one LLINs at the  
111 household; however, this has not translated to commensurate LLIN use. Among other  
112 reasons, heat from sleeping in the LLIN is one of the most cited barriers to regular LLIN use,  
113 especially during the dry season. Other reported barriers to LLIN use include skin irritation;  
114 poor ventilation in sleeping areas; and, in some cases, a lack of knowledge of the  
115 relationship between the LLIN use and malaria prevention [5,6].

116

117 The LLINs distributed through campaigns and continuous distribution channels are normally  
118 provided for free. However, with declining support to the country as it attained a middle-  
119 income status, there is the need to position users to begin to think about procuring their  
120 own nets. LLINs are socially desired and accepted in many communities, but programmes  
121 struggle to convince people to buy, maintain, and utilise them properly. Designing a  
122 sustainable and effective LLINs strategy is difficult because several social and cultural factors  
123 influence the adoption and use of LLINs in communities. For example, in several parts of  
124 Africa, including Ghana, malaria health-seeking behaviour among people does not indicate a  
125 connection between mosquito bites and malaria as these are attributed to other factors  
126 [7,8].

127

128 These data suggest that more social, cultural, and behavioural research is needed to  
129 understand how local knowledge of transmission, diagnosis, treatment, and prevention

130 influences the utilisation of ITN interventions. In order to create community-based malaria  
131 control programmes that are sustainable and encourage behaviour change as well as the  
132 adoption of new concepts and technologies, it is helpful to understand local knowledge  
133 about malaria [7] and used of context specific strategies.

134

### 135 **The Community Health Advocacy Team (CHAT) Innovation in Ghana**

136 Evaluations conducted in Ghana have consistently discovered a large disparity between  
137 household ownership of LLINs and the use of LLINs, with LLINs use always significantly lower  
138 than ownership of at least one ITN. This has been interpreted as evidence of the inability to  
139 achieve appropriate net use, or as a failure of social behaviour change communication  
140 (SBCC) to sufficiently improve LLIN use [6,9,10]. Considering this evidence, innovative social  
141 interventions that encourage behaviour change are required to meet the objectives of the  
142 LLIN distribution campaign [11]. Through community-based programmes, government,  
143 health organisations, and social actors, all relevant stakeholders can collaborate closely to  
144 solve public health problems in the population.

145

146 As a consequence, a Community Health Advocacy Team (CHAT) intervention was co-created  
147 by researchers, community members, district health management team and National  
148 Malaria Elimination Programme in six districts in Ghana. The CHAT uses a person-centred  
149 approach to promote LLIN access and use by leveraging on Ghana's Community-based  
150 Health Planning and Services (CHPS) programme (i.e., primary health care system), to  
151 ensure community involvement, ownership, and sustainability of the LLIN PMD campaigns  
152 [12].

153

154 A CHAT consists of nine members who are influential in their respective communities:  
155 namely, Community Health Officers, religious leaders, School Health Education Programme  
156 coordinators, assemblymen/women, community information officers, representatives from  
157 the security services, community-based organisations, and traditional authorities. The terms  
158 of reference of the CHAT are generally based on NMEP's key elements of the campaign  
159 functions at the sub-district level: household registration, training, SBCC activity, logistics,  
160 distribution, and supervision.

161

162 The CHAT members were trained on how to carry out malaria education and prevention  
163 activities, as well as the promotion of net use within communities and primary health care  
164 levels during and after PMD campaigns. Specifically, the CHAT members are expected to  
165 provide community-level support for LLIN distribution channels through PMD campaigns;  
166 through continuous distribution of LLINs in schools, ANC and CWC; and develop context-  
167 based Social and Behaviour Change Communication (SBCC) strategies on malaria prevention  
168 and consistent use of LLINs. The CHAT sensitizes the community on the proper use and  
169 maintenance of LLINs, supports with the management of LLINs logistics during distribution  
170 exercises and accountability, and assists other community-based health campaigns [13].  
171 CHAT use community-based strategies such as house-to-house, community durbars, use  
172 community information centres and school health platforms to promote the use of ITNs. In  
173 addition, CHAT members collaborate with district health management team and other civil  
174 society groups to provide voluntary campaigns on LLINs use. The teams officially started  
175 their activities in the community in November 2021.

176

177 This paper assesses the implementation outcomes and short-term effectiveness of the co-  
178 created CHAT intervention in six districts in Ghana. We hypothesise that if the CHATs are  
179 effective after a four-month pilot implementation, the CHAT will be highly acceptable,  
180 appropriate, and feasible, and there will be a significant increase in LLIN awareness, access,  
181 willingness to purchase, and use before and after the pilot implementation.

182

## 183 **Methods and Materials**

### 184 **Ethical Approval**

185 Ethical clearance was obtained from the Ghana Health Service Ethics Review Committee  
186 (GHS-ERC: 002/06/21) before the commencement of all data collection. All research  
187 assistants received specific training before data collection per the study's training protocol.  
188 Participants involved in this study provided written informed consent before participating in  
189 the study. Participants were informed about the aim of the study, procedures, benefits of  
190 the study, as well as their rights as participants. The information and consent documents for  
191 participants were written in simple English. To enhance comprehension, research assistants

192 were present during the informed consent process to explain any questions that the  
193 participants did not understand. Those consenting to participate in the study signed (or  
194 placed a thumbprint on) an informed consent form, before participating in the study. All  
195 participants were assured that the information they provided would be handled  
196 confidentially and research findings would be reported with complete anonymity.

197

## 198 **Study design**

199 We used a one-group pre-post study design and measured our outcomes (1) LLIN awareness  
200 [2], LLIN access [3], willingness to purchase LLIN [4], LLIN use [5], acceptability [6],  
201 appropriateness, and [7] feasibility among community members, before implementing the  
202 CHAT intervention, and again four months after implementation. We used the Reach,  
203 Effectiveness, Adoption, Implementation and Maintenance (RE-AIM) framework [14] as the  
204 basis for determining and assessing the implementation outcomes and short-term  
205 effectiveness of our study outcomes. To assess effectiveness, we restricted ourselves to  
206 measuring short-term differential rates in the utilisation of the CHAT and its related  
207 activities.

208

## 209 **Study Areas**

210 The study was conducted in six districts – three in the Eastern Region and three in the Volta  
211 Region of Ghana. These were communities in districts where the 2021 PMD campaigns of  
212 LLINs were ongoing. We ensured that baseline assessments were done in the selected  
213 communities before their involvement in NMEP's key elements of the campaign (i.e.,  
214 registration and distribution activities for the 2021 PMD). Also, the implementation of the  
215 CHAT was planned to run within NMEP structures as our aim was to transition the entire  
216 PMD campaign into CHPS. The districts that participated in the study were selected through  
217 purposive sampling because they recorded the highest malaria prevalence in 2020 in the  
218 two regions: Ho West (Tsito-90%), Ho (Takla Hokpeta-75%) and Agortime Ziope (Kpetoe-  
219 100%) in the Volta Region; and Birim South (Apoli-94%), Achiase (Achiase-94%) and  
220 Abuakwa North (Kukurantumi-93%) in the Eastern Region [1]. At the time of the study,  
221 continuous/routine LLINs distributions in schools and antenatal clinics were also ongoing in  
222 these communities.



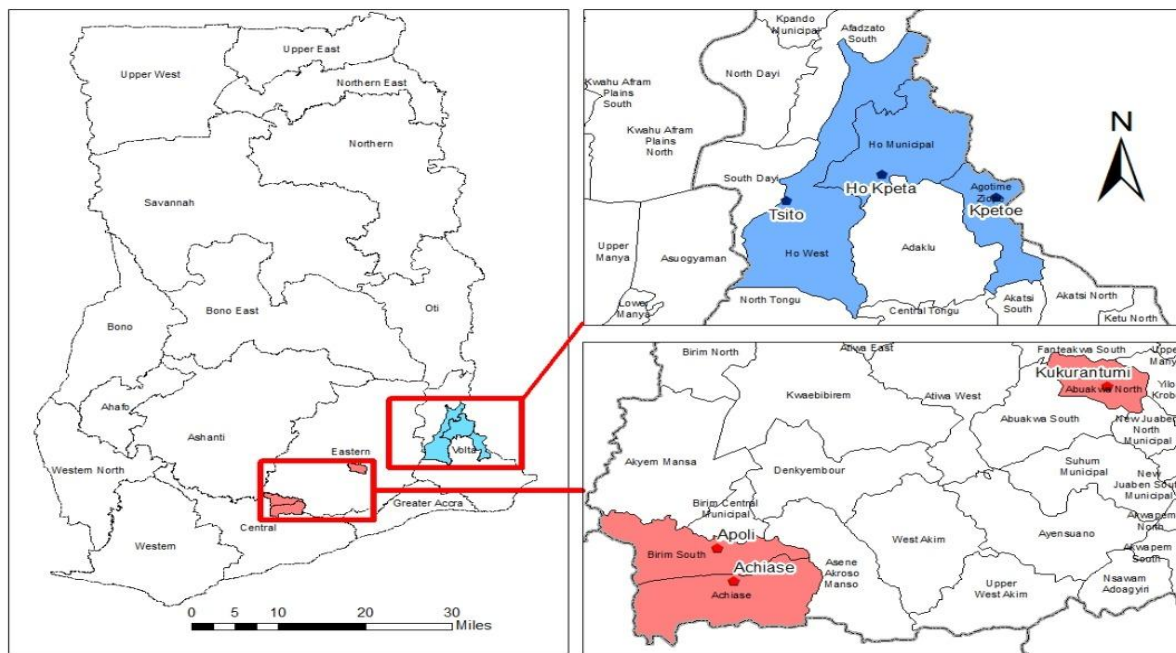

223

224 *Figure 1: Location of the six districts in the Eastern and Volta Regions of Ghana*

225

## 226 **Population, sample size and sampling procedure**

227 The study population was made up of adult men and women from communities within the  
228 six districts in the two regions in southern Ghana. We used data from the Ghana Statistical  
229 Service (GSS) to initially list all eligible households in the selected communities. A systematic  
230 random sampling technique was then used to select the needed number of households for  
231 the study. Each community in the targeted region and district was allocated a sample size  
232 proportional to its population size. Using Cochran's Sample Size Formula with an  $\alpha$ -level of  
233 5%, a margin of error associated with the estimates to be 5%, and a 50% anticipated use of  
234 Mass LLIN distribution, the estimated sample size was 800 for both baseline and end-line  
235 surveys.

236

237

238

## 239 **Data collection tools and procedure**

240 Although both qualitative and quantitative methods were used at various stages of the  
241 study to contextualize and explore the barriers to, and enablers of Mass LLIN Distribution  
242 Campaigns, and to identify baseline parameters to be used for assessing the effectiveness of

243 our co-created intervention, only the outcomes of the quantitative surveys are presented in  
244 this paper.

245

246 A structured questionnaire was developed for both the baseline and end-line surveys to  
247 collect information on the socio-demographic characteristics of households, socioeconomic  
248 status of the households, knowledge and perceptions about co-created intervention, use of  
249 LLINs, care of LLINs, the prevalence of malaria among children under five six weeks before  
250 the survey, etc. The survey questionnaire was developed in Research and Electronic Data  
251 Capture (REDCap) for onsite electronic data collection. The structured questionnaires were  
252 translated into three key local languages (Twi, Ga, and Ewe) and preloaded on Android  
253 tablet computers. All data were collected using face-to-face interviews with trained  
254 research assistants. Responses were uploaded instantly or shortly afterwards into a cloud-  
255 based data management system, which was regulated by the project team at the University  
256 of Ghana School of Public Health. The baseline survey was conducted in August 2021 and  
257 the end-line survey happened in March 2022.

## 258 **Measures**

### 259 *Implementation outcomes*

260 *Measures of acceptability, appropriateness, and feasibility* were used to assess  
261 implementation outcomes of our intervention implementation. Acceptability is the  
262 perception among implementation stakeholders that a given treatment, service, practice, or  
263 innovation is agreeable, palatable, or satisfactory; appropriateness is the perceived fit,  
264 relevance, or compatibility of the innovation or evidence-based practice for a given practice  
265 setting, provider, or consumer, and/or perceived fit of the innovation to address a particular  
266 issue or problem; while feasibility is defined as the extent to which a new treatment or  
267 innovation can be successfully used or carried out within a given agency or setting [15].  
268 These measures have four items each on a five-point Likert scale ranging from never (0) to  
269 always (4). In a validation study, the Cronbach's alpha for the acceptability, appropriateness,  
270 and feasibility measures were 0.85, 0.91 and 0.89 respectively [15].

271

### 272 *Short-term effectiveness outcomes*

273 Awareness, access to LLIN, willingness to purchase LLIN, and LLIN use were utilised to assess  
274 the short-term effectiveness of the implementation of our intervention. These measures

275 were adapted from the 2019 Ghana Malaria Indicator Survey Household Survey [4].  
276 Awareness was assessed with the question “Have you heard about mosquito/bed net?”;  
277 access was assessed by asking “Does your household have a mosquito/bed net?”;  
278 willingness to purchase was assessed by asking “Are you willing to buy mosquito/bed nets  
279 for your household members?”; and LLIN use was assessed with the question “Did you or  
280 any of your household members sleep under a mosquito/bed net last night?” All four  
281 questions had dichotomized response options, Yes or No.

282

283 In addition to the implementation outcome measures and short-term effectiveness  
284 measures, time (i.e., baseline and end-line) was used as the main predictor of the  
285 effectiveness outcomes.

286

### 287 ***Statistical analysis***

288 Data were downloaded directly from REDCap into SPSS 22. Data editing and formatting  
289 were done to ensure the correctness of the data. Data were also explored for normality  
290 using skewness and kurtosis prior to analysis. To estimate the level of acceptability,  
291 appropriateness, and feasibility of the intervention, we first created summated scores of  
292 these measures and then categorised them into low and high. Only completed data out of  
293 the 800 were used to compute the summated scores and for further analysis. Descriptive  
294 statistics were then performed to estimate the frequencies of the implementation outcome  
295 variables at end-line only. Also, the McNemar test for paired proportions was performed to  
296 determine the association between baseline and end-line measures of all short-term  
297 effectiveness outcomes i.e., LLIN awareness, access, willingness to purchase and use. A p-  
298 value <0.05 was considered statistically significant.

299

300

301

## 302 **Results**

### 303 **Socio-demographic Characteristics of Participants**

304 At both baseline and end-line, females were 70% of participants with a near equal number  
 305 of males and females in all six districts. (Table 1)

306

307 Table 1: Socio-demographic characteristics of participants

| District                                 | Sex                |            |            |                   |            |            |
|------------------------------------------|--------------------|------------|------------|-------------------|------------|------------|
|                                          | Baseline (N = 800) |            |            | Endline (N = 800) |            |            |
|                                          | Male               | Female     | Total      | Male              | Female     | Total      |
| Ho West (Tsito) <sup>1</sup>             | 40                 | 95         | 135        | 40                | 95         | 135        |
| Agotime Ziope (Kpetoe) <sup>1</sup>      | 28                 | 107        | 135        | 28                | 107        | 135        |
| Ho (Hokpeta) <sup>1</sup>                | 43                 | 87         | 130        | 43                | 87         | 130        |
| Birim South (Apoli) <sup>2</sup>         | 58                 | 70         | 128        | 57                | 71         | 128        |
| Achiase (Achiase) <sup>2</sup>           | 36                 | 102        | 138        | 37                | 101        | 138        |
| Abuakwa North (Kukurantumi) <sup>2</sup> | 36                 | 98         | 134        | 36                | 98         | 134        |
| <b>Total</b>                             | <b>241</b>         | <b>559</b> | <b>800</b> | <b>241</b>        | <b>559</b> | <b>800</b> |

308 <sup>1</sup>Volta Region; <sup>2</sup>Eastern Region

309

### 310 Assessment of implementation outcomes

311 Nearly all (90%) of community members thought that the intervention was acceptable,  
 312 appropriate, and feasible after its implementation (Table 2).

313

314 Table 2: Acceptability, appropriateness, and feasibility of the Community Health Advocacy  
 315 Team in six districts

| Outcome measures | Level         |                |               |
|------------------|---------------|----------------|---------------|
|                  | Lower (N (%)) | Higher (N (%)) | Total (N (%)) |
| Acceptability    | 36 (10.2)     | 317 (89.8)     | 353 (100)     |
| Appropriateness  | 37 (10.5)     | 316 (89.5)     | 353 (100)     |
| Feasibility      | 35 (10)       | 316 (90)       | 351 (100)     |

316

317 Also, when disaggregated by district, the majority of community members in all six districts  
318 mentioned that the CHAT intervention was acceptable, appropriate and feasible (Table 3).  
319

320 Table 3: Acceptability, appropriateness, and feasibility of the Community Health Advocacy  
 321 Team by district

| District                       | Acceptability |            |            | Appropriateness |            |            | Feasibility |            |            |
|--------------------------------|---------------|------------|------------|-----------------|------------|------------|-------------|------------|------------|
|                                | Lower         | Higher     | Total      | Lower           | Higher     | Total      | Lower       | Higher     | Total      |
| Ho West (Tsito)                | 15            | 16         | 31         | 15              | 16         | 31         | 15          | 16         | 31         |
| Agotime Ziope<br>(Kpetoe)      | 14            | 33         | 47         | 15              | 32         | 47         | 14          | 33         | 47         |
| Ho (Hokpeta)                   | 6             | 51         | 57         | 6               | 51         | 57         | 5           | 51         | 56         |
| Birim South (Apoli)            | 1             | 101        | 102        | 1               | 101        | 102        | 1           | 102        | 103        |
| Achiase (Achiase)              | 0             | 87         | 87         | 0               | 87         | 87         | 0           | 86         | 86         |
| Abuakwa North<br>(Kukurantumi) | 0             | 28         | 28         | 0               | 28         | 28         | 0           | 28         | 28         |
| <b>Total</b>                   | <b>36</b>     | <b>317</b> | <b>353</b> | <b>37</b>       | <b>316</b> | <b>353</b> | <b>35</b>   | <b>316</b> | <b>351</b> |

322

323 **Assessment of short-term effectiveness outcomes**

324 There was a statistically significant association between baseline and end-line assessment  
 325 on all four effectiveness outcome measures (Table 4). Household members' awareness of  
 326 LLINs, access to LLINs, willingness to purchase LLINs, and use of LLINs increased significantly  
 327 over the four-month period that the CHAT intervention was implemented in the six districts.  
 328 Households in the six districts were more likely to engage with LLIN campaign activities after  
 329 the implementation of the CHAT intervention.

330

331 The highest increasement was in access, followed by use, willingness to purchase, and then  
 332 awareness.

333

334

335

336

337

338 Table 4: Cross tabulations showing effectiveness outcomes from baseline to end-line

| Responses                            | Time     |         |       | Chi-squared |
|--------------------------------------|----------|---------|-------|-------------|
|                                      | Baseline | Endline | Total |             |
| <b>Awareness of LLINs</b>            |          |         |       |             |
| No                                   | 0        | 45      | 45    |             |
| Yes                                  | 11       | 744     | 755   | 19.45***    |
| Total                                | 11       | 789     | 800   |             |
| <b>Access to LLINs</b>               |          |         |       |             |
| No                                   | 28       | 229     | 257   |             |
| Yes                                  | 44       | 499     | 543   | 124.02***   |
| Total                                | 72       | 728     | 800   |             |
| <b>Willingness to Purchase LLINs</b> |          |         |       |             |
| No                                   | 84       | 263     | 347   |             |
| Yes                                  | 126      | 327     | 453   | 47.55***    |
| Total                                | 210      | 590     | 800   |             |
| <b>LLIN Use</b>                      |          |         |       |             |
| No                                   | 106      | 313     | 419   |             |
| Yes                                  | 91       | 290     | 381   | 120.89***   |
| Total                                | 197      | 603     | 800   |             |

339 \*\*\* $p < 0.001$

340

341

## 342 Discussion

343 This paper assesses the implementation outcomes and short-term effectiveness of the co-  
 344 created CHAT intervention for awareness, access, willingness to purchase, and use of LLINs  
 345 across six districts in Ghana. The current study contributes to our understanding of how  
 346 CHATs can be used to promote LLINs before, during and after campaigns in Ghana.

347

348 The study findings show that the CHAT intervention was highly accepted by the community  
 349 members in all six study districts. This implies that the community members view the CHAT  
 350 intervention as satisfactory in promoting access to and use of LLIN. Building trust among

351 various stakeholders contributes to the acceptability of implementation research [16]. The  
352 high acceptability observed here can be attributed to the approach used in this study, such  
353 as the use of SBCC, community mobilisation, and engagement of community stakeholders  
354 and community members throughout the intervention development and implementation  
355 processes. As evident in other studies employing Social and Behaviour Change  
356 Communication (SBCC) strategies, the involvement of community stakeholders, leaders and  
357 community volunteers helps build trust among community members and fosters community  
358 buy-in of malaria intervention which is crucial to the acceptability and sustainability of  
359 interventions [17].

360

361 Similarly, the study showed that the CHAT intervention was appropriate and feasible. While  
362 appropriateness as an implementation outcome refers to the perceived fit, relevance, or  
363 compatibility of the innovation or evidence-based practice for a given practice setting,  
364 provider, or consumer; and/or perceived fit of the innovation to address a particular issue or  
365 problem, feasibility is the extent to which a new treatment, or an innovation, can be  
366 successfully used or carried out within a given agency or setting [18]. Community members  
367 from all six study communities perceived the CHAT intervention to be highly appropriate  
368 and feasible. This suggests that the CHAT intervention is a good fit with the value system of  
369 the community members and is regarded as practical and adequate for further  
370 implementation. Studies have shown that high appropriateness and feasibility are necessary  
371 requirements for successful intervention implementation and the achievement of  
372 intervention outcomes [18–20].

373

374 Furthermore, there was a statistically significant association between baseline and end-line  
375 assessment on all four effectiveness outcome measures. The study showed a high increment  
376 in awareness level, access, willingness to purchase and use of LLINs. The association  
377 between community involvement and malaria awareness is consistent with other malaria  
378 studies conducted in Rwanda and Malawi which found that community involvement in  
379 malaria control intervention increased awareness of malaria and the intervention being  
380 implemented [21,22]. A high awareness level among community members could also help



381 address community misconceptions about LLIN use as becoming knowledgeable about  
382 malaria prevention strategies will consequently increase LLIN use among community  
383 members [6]. Though there are few studies on willingness to pay for malaria control  
384 interventions in Sub-Saharan Africa [23,24], existing studies reveal that, when considered in  
385 the context of community engagement and the requirement for local support for financial  
386 sustainability of malaria control, the determination of consumer preferences and demand is  
387 significant in community-based health interventions [24,25].

388

389 Access to and use of LLINs has been vital in malaria prevention in Ghana. Previous studies  
390 have shown that there is a gap between LLIN access and LLIN use [6]. Evaluations have  
391 consistently discovered a large disparity between household ownership of LLIN and the use  
392 of LLIN, with LLIN use always significantly lower than ownership of at least one LLIN. This has  
393 been interpreted as evidence of the inability to achieve appropriate net use or as a failure of  
394 behaviour change communication to sufficiently improve LLIN use [6,9,10]. By employing  
395 innovative social interventions that encourage behaviour change, and co-creating the CHAT  
396 interventions with community stakeholders, this study has recorded high access to LLIN and  
397 appropriate LLIN use in all six study communities. As evident in other community-based  
398 studies [21,22,24], engaging community members and key stakeholders at the grassroots  
399 level has shown to have contributed to a successful implementation of the CHAT  
400 intervention.

## 401 **Limitations**

402 Although this study provided the implementation and effectiveness outcomes of CHAT  
403 intervention to improve LLIN distribution campaigns and continuous channels in six districts  
404 in Ghana with significant outcomes, the duration of the pilot implementation (i.e., 4  
405 months) is relatively short to unravel all implementation and effectiveness outcomes. Also,  
406 the study was conducted in six communities within 2 regions in Ghana, so caution needs to  
407 be exercised when generalizing the findings to the whole of Ghana or other LMICs.  
408 Furthermore, due to the seasonality of malaria transmission in Ghana (i.e., during rainy  
409 seasons: April to June and September to November), the season within which the CHAT was  
410 implemented could have influenced the results. There is the need for long-term

411 implementation of the CHAT to effectively observe the seasonal variations of  
412 implementation outcomes and effectiveness outcomes of CHAT to promote LLIN use for  
413 malaria control.

414

## 415 **Conclusion**

416 The CHAT intervention is effective in promoting LLIN use among community members. The  
417 use of SBCC, community mobilisation and stakeholder engagement has contributed to  
418 community involvement and buy-in of the CHAT intervention, thereby increasing its  
419 acceptability and feasibility in the study communities. The CHAT intervention is perceived as  
420 appropriate by community members and considered to be practical and adequate for  
421 further implementation. A higher level of awareness of LLINs recorded at the end-line will  
422 help contribute to the reduction of misconceptions regarding LLINs and malaria control and  
423 prevention, thereby increasing access to and use of LLINs. The high level of willingness to  
424 purchase LLINs is also important for local support of the financial sustainability of malaria  
425 control interventions. Finally, the CHAT intervention' effectiveness in increasing access to  
426 and use of LLINs could contribute to malaria reduction and elimination in Ghana. The co-  
427 created CHAT in Ghana is an acceptable, appropriate, and feasible intervention for  
428 supporting the National Malaria Elimination Programme in the periodic Point Mass  
429 Distribution campaigns of LLINs, and for engaging in SBCC activities to support the  
430 continuous channels of distribution. CHAT can be used to transition the PMD and  
431 continuous distribution of LLINs into the Primary Health Care system in communities in  
432 Ghana.

## 433 **Declarations**

## 434 **Acknowledgments**

435 We would like to thank all stakeholders: members and staff from the Ghana Health Service  
436 (GHS) and the National Malaria Control Programme (NMCP), the Volta and Eastern Regional  
437 Directors of Health Services, the District Health Directors of Ho West; Ho; Agortime Ziope;  
438 Birim South; Achiase and Abuakwa North Districts, CHAT members, as well as community  
439 members who committed time to share experiences and provide data for this study. We are

440 also grateful to the field staff for their meticulous work during data collection. Finally, we  
441 thank the HCE team (Allison Snyder, Patricia Richmond and Kristin Saarlus) for their  
442 constructive review and useful comments that strengthened the paper.

#### 443 **Abbreviations**

444 ANC: Antenatal Clinic

445 CHAT: Community Health Advocacy Team

446 CHPS: Community-based Health Planning and Services

447 CWC: Child Welfare Clinic

448 GHS: Ghana Health Service

449 HCE: Task Force for Global Health's Health Campaign Effectiveness (HCE) Program

450 LLINs: Long Lasting Insecticide Treated Net

451 NMEP: National Malaria Elimination Programme

452 PMD: Point Mass Distribution

453 RE-AIM: Reach, Effectiveness, Adoption, Implementation and Maintenance

454 SBCC: Social and Behavioural Change Communication

455 WHO: Ghana Health Service

#### 456 **References**

457 1. World Health Organization. Malaria. 2022.

458 2. World Health Organization. Private sector support key in achieving Zero Malaria in  
459 Ghana | WHO | Regional Office for Africa. 2021.

460 3. Severe Malaria Observatory. Malaria in Ghana: Statistics & Facts | Severe Malaria  
461 Observatory. 2022.

462 4. National Malaria Control Programme. Ghana Malaria Indicator Survey 2019. Natl  
463 Malar Control Program. 2020; 1–159.

464 5. Jaeger MS, Briët OJT, Keating J, Ahorlu CK, Yukich JO, Oppong S, et al. Perceptions on

- 465 the effect of small electric fans on comfort inside bed nets in southern Ghana: a  
466 qualitative study. *Malar J.* 2016;15: 1–7.
- 467 6. Ahorlu CS, Adongo P, Koenker H, Zigirumugabe S, Sika-Bright S, Koka E, et al.  
468 Understanding the gap between access and use: a qualitative study on barriers and  
469 facilitators to insecticide-treated net use in Ghana. *Malar J.* 2019;18: 1–13.
- 470 7. Adongo PB, Kirkwood B, Kendall C. How local community knowledge about malaria  
471 affects insecticide-treated net use in northern Ghana. *Trop Med Int Heal.* 2005;10:  
472 366–378.
- 473 8. Hill Z, Kendall C, Arthur P, Kirkwood B, Adjei E. Recognizing childhood illnesses and  
474 their traditional explanations: exploring options for care-seeking interventions in the  
475 context of the IMCI strategy in rural Ghana. *Trop Med Int Heal.* 2003;8: 668–676.
- 476 9. Korenromp EL, Miller J, Cibulskis RE, Cham MK, Alnwick D, Dye C. Monitoring  
477 mosquito net coverage for malaria control in Africa: Possession vs. use by children  
478 under 5 years. *Trop Med Int Heal.* 2003;8: 693–703. doi:10.1046/j.1365-  
479 3156.2003.01084.x
- 480 10. Macintyre K, Keating J, Okbaldt YB, Zerom M, Sosler S, Ghebremeskel T, et al. Rolling  
481 out insecticide treated nets in Eritrea: Examining the determinants of possession and  
482 use in malarious zones during the rainy season. *Trop Med Int Heal.* 2006;11: 824–833.  
483 doi:10.1111/j.1365-3156.2006.01637.x
- 484 11. Wakefield MA, Loken B, Hornik RC. Use of mass media campaigns to change health  
485 behaviour. *Lancet.* 2010;376: 1261–1271.
- 486 12. Glozah F, Asampong E, Tabong PT-N, Nwameme A, Hornuvo R, Chandi M, et al.  
487 Creating interventions to transition long-lasting insecticide net distribution in Ghana.  
488 *BMJ Open.* 2022;12: e063121.
- 489 13. Dako-Gyeke P, Hornuvo R, Glozah F, Asampong E, Tabong P, Al E. Pilot  
490 Implementation of Community Health Advocacy Teams to Improve the Effectiveness  
491 of Long-Lasting Insecticide Net Distribution through both Campaigns and Continuous  
492 Channels in Ghana : A Qualitative Study of Opportunities and Barriers to  
493 Implementation. Preprint. 2022; 1–18. doi:<https://doi.org/10.21203/rs.3.rs->

- 494 2510312/v1
- 495 14. Glasgow RE, Harden SM, Gaglio B, Rabin B, Smith ML, Porter GC, et al. RE-AIM  
496 Planning and Evaluation Framework: Adapting to New Science and Practice With a 20-  
497 Year Review . *Frontiers in Public Health* . 2019.
- 498 15. Weiner BJ, Lewis CC, Stanick C, Powell BJ, Dorsey CN, Clary AS, et al. Psychometric  
499 assessment of three newly developed implementation outcome measures.  
500 *Implement Sci.* 2017;12: 1–12.
- 501 16. Perera C, Bakrania S, Ipince A, Nesbitt-Ahmed Z, Obasola O, Richardson D, et al.  
502 Impact of social protection on gender equality in low- and middle-income countries: A  
503 systematic review of reviews. *Campbell Syst Rev.* 2022;18. doi:10.1002/cl2.1240
- 504 17. Abamecha F, Midaksa G, Sudhakar M, Abebe L, Kebede Y, Mamo A, et al.  
505 Acceptability and feasibility of the school-engaged social and behavior change  
506 communication approach on malaria prevention in Ethiopia: implications for  
507 engagement, empowerment, and retention (EER) of education sectors in malaria  
508 elimination efforts. *BMC Public Health.* 2021;21: 1–11.
- 509 18. Proctor E, Silmere H, Raghavan R, Hovmand P, Aarons G, Bunger A, et al. Outcomes  
510 for implementation research: conceptual distinctions, measurement challenges, and  
511 research agenda. *Adm policy Ment Heal Ment Heal Serv Res.* 2011;38: 65–76.
- 512 19. Luberto CM, Wasson RS, Kraemer KM, Sears RW, Hueber C, Cotton S. Feasibility,  
513 Acceptability, and Preliminary Effectiveness of a 4-Week Mindfulness-Based Cognitive  
514 Therapy Protocol for Hospital Employees. *Mindfulness (N Y).* 2017;8: 1522–1531.  
515 doi:10.1007/s12671-017-0718-x
- 516 20. Sucich JT, Lehrer J, Breitbart V, Julliard KN. Mindfulness training for community-based  
517 psychotherapists: a feasibility study. *Pilot Feasibility Stud.* 2022;8: 1–12.  
518 doi:10.1186/s40814-022-01205-x
- 519 21. Ingabire CM, Hakizimana E, Rulisa A, Kateera F, Van Den Borne B, Muvunyi CM, et al.  
520 Community-based biological control of malaria mosquitoes using *Bacillus*  
521 *thuringiensis* var. *israelensis* (Bti) in Rwanda: Community awareness, acceptance and  
522 participation. *Malar J.* 2017;16: 1–13. doi:10.1186/s12936-017-2046-y

- 523 22. Gowelo S, McCann RS, Koenraadt CJM, Takken W, Van Den Berg H, Manda-Taylor L.  
524 Community factors affecting participation in larval source management for malaria  
525 control in Chikwawa District, Southern Malawi. *Malar J.* 2020;19: 1–11.  
526 doi:10.1186/s12936-020-03268-8
- 527 23. Reddy MR, Overgaard HJ, Abaga S, Reddy VP, Caccone A, Kiszewski AE, et al. Outdoor  
528 host seeking behaviour of *Anopheles gambiae* mosquitoes following initiation of  
529 malaria vector control on Bioko Island, Equatorial Guinea. *Malar J.* 2011;10: 1–10.  
530 doi:10.1186/1475-2875-10-184
- 531 24. Mboera LEG, Kramer RA, Miranda ML, Kilima SP, Shayo EH, Lesser A. Community  
532 knowledge and acceptance of larviciding for malaria control in a rural district of east-  
533 central Tanzania. *Int J Environ Res Public Health.* 2014;11: 5137–5154.  
534 doi:10.3390/ijerph110505137
- 535 25. Onwujekwe O, Malik EFM, Mustafa SH, Mnzava A. Socio-economic inequity in  
536 demand for insecticide-treated nets, in-door residual house spraying, larviciding and  
537 fogging in Sudan. *Malar J.* 2005;4: 1–8. doi:10.1186/1475-2875-4-62
- 538
